54. Merboldt KD, Bruhn H, Hänicke W, Michaelis T, Frahm J: Decrease of glucose in the human visual cortex during photic stimulation. *Magn Reson Med* 1992; 25:187-94
55. Dienel GA: Brain lactate metabolism: The discoveries and the controversies. *J Cereb Blood Flow Metab* 2012; 32: 1107-38
56. Kayser EB, Suthammarak W, Morgan PG, Sedensky MM: Isoflurane selectively inhibits distal mitochondrial complex I in *Caenorhabditis elegans*. *Anesth Analg* 2011; 112:1321-9
57. Saneto RP, Friedman SD, Shaw DW: Neuroimaging of mitochondrial disease. *Mitochondrion* 2008; 8:396-413
58. Bajwa SA, Costi D, Cyna AM: A comparison of emergence delirium scales following general anesthesia in children. *Paediatr Anaesth* 2010; 20:704-11
59. Cravero JP, Beach M, Dodge CP, Whalen K: Emergence characteristics of sevoflurane compared to halothane in pediatric patients undergoing bilateral pressure equalization tube insertion. *J Clin Anesth* 2000; 12:397-401
60. Cravero J, Surgenor S, Whalen K: Emergence agitation in paediatric patients after sevoflurane anaesthesia and no surgery: A comparison with halothane. *Paediatr Anaesth* 2000; 10:419-24
61. Faulk DJ, Twite MD, Zuk J, Pan Z, Wallen B, Friesen RH: Hypnotic depth and the incidence of emergence agitation and negative postoperative behavioral changes. *Paediatr Anaesth* 2010; 20:72-81
62. Sanders RD: Hypothesis for the pathophysiology of delirium: Role of baseline brain network connectivity and changes in inhibitory tone. *Med Hypotheses* 2011; 77:140-3
63. Engel GL, Romano J: Delirium, a syndrome of cerebral insufficiency. 1959. *J Neuropsychiatry Clin Neurosci* 2004; 16:526-38
64. Tononi G, Laureys S, eds: *The neurology of consciousness: An overview*. London: Academic Press; 2009

## ANESTHESIOLOGY REFLECTIONS FROM THE WOOD-LIBRARY

### Patrick Sim's Annotated Bibliography

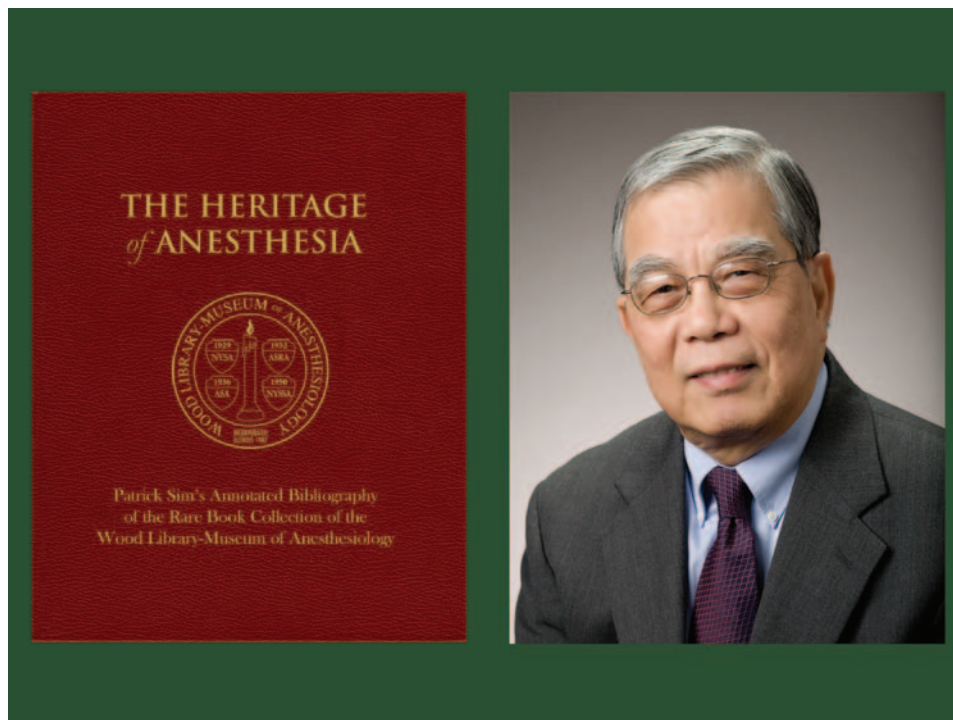

During most of his 39 years as sole and then managing librarian at the Wood Library-Museum (WLM), Patrick Pui-Kam Sim, M.L.S. (1939–2010, *right*), inscribed note cards with his observations about the WLM's collection of antiquarian books. WLM Laureate Donald Caton, WLM Publications Chair Kathryn McGoldrick, Editor Pauline Snyder, and WLM Archivist Felicia Reilly comprise the editorial team behind the 2012 publication (*left*) of these observations by Paul M. Wood Distinguished Librarian Emeritus Sim. Prospective readers will have to line up behind the WLM's honorary curator to order a copy of *The Heritage of Anesthesia: Patrick Sim's Annotated Bibliography of the Rare Book Collection of the Wood Library-Museum of Anesthesiology*. (Copyright © the American Society of Anesthesiologists, Inc.)

George S. Bause, M.D., M.P.H., Honorary Curator, ASA's Wood Library-Museum of Anesthesiology, Park Ridge, Illinois, and Clinical Associate Professor, Case Western Reserve University, Cleveland, Ohio. UJYC@aol.com.
